# Supplementary material
Source: MDPI journal article supplement (https://www.mdpi.com/2624-8611/4/3/43)
Supplement: s1 [file s1]

**Table S1.** *Reliability estimates, descriptive statistics, and factor loadings*

| Variable                                                | Cronbach alpha<br>(a) | Omega<br>( $\omega$ ) | Standardized Factor<br>Loadings<br><br>Mean (Range) |
|---------------------------------------------------------|-----------------------|-----------------------|-----------------------------------------------------|
| Climate Anxiety: Cognitive-emotional impairment         | 0.83                  | 0.87                  | 0.65 (0.46 – 0.75)                                  |
| Climate Anxiety: Functional impairment                  | 0.80                  | 0.85                  | 0.63 (0.47 – 0.73)                                  |
| Consideration of Future Consequences: Future            | 0.75                  | 0.79                  | 0.55 (0.46 – 0.66)                                  |
| Consideration of Future Consequences: Immediate         | 0.77                  | 0.82                  | 0.60 (0.46 – 0.74)                                  |
| Emotional consequences to information on climate change | 0.91                  | 0.92                  | 0.76 (0.70 – 0.83)                                  |

**Table S2.** *Correlations between latent variables*

| Variable                                                | 1        | 2        | 3        | 4        | 5       |
|---------------------------------------------------------|----------|----------|----------|----------|---------|
| Climate Anxiety: Cognitive-emotional impairment         |          |          |          |          |         |
| Climate Anxiety: Functional impairment                  | 0.89***  |          |          |          |         |
| Consideration of Future Consequences: Future            | 0.38***  | 0.37***  |          |          |         |
| Consideration of Future Consequences: Immediate         | -0.29*** | -0.21*** | -0.65*** |          |         |
| Information seeking on climate change                   | 0.52***  | 0.51***  | 0.38***  | -0.15**  |         |
| Emotional consequences to information on climate change | 0.46***  | 0.40***  | 0.27***  | -0.21*** | 0.31*** |

Note. †p < 0.10. \*p < 0.05. \*\*p < 0.01. \*\*\*p < 0.001.
